# Supplementary material for: Effect for Human Genomic Variation During the BMP4-Induced Conversion From Pluripotent Stem Cells to Trophoblast
Source: PubMed Central journal article supplement (PMC7154154; doi:10.3389/fgene.2020.00230), 2020-04-07
Supplement: Presentation_1.pdf [file Presentation_1.pdf]

## Supplementary Material

### Effect for human genomic variation during the BMP4-induced conversion from pluripotent stem cells to trophoblast

Hai-tao Li<sup>†</sup>, Yajun Liu<sup>2,†</sup>, Hongde Liu<sup>1\*</sup>, Xiao Sun<sup>1\*</sup>

<sup>1</sup>State Key Laboratory of Bioelectronics, School of Biological Science and Medical Engineering, Southeast University, Nanjing, 210096, P.R. China

<sup>2</sup>The Second Affiliated Hospital of Zhengzhou University, No. 2 Jingba road, Zhengzhou; Academy of Medical Sciences of Zhengzhou University Translational Medicine platform, Zhengzhou University, No.100 Science Avenue, Zhengzhou City, Henan Province, 450001, P.R. China.

**\* Correspondence:**

Hongde Liu; [liuhongde@seu.edu.cn](mailto:liuhongde@seu.edu.cn)

Xiao Sun; [xsun@seu.edu.cn](mailto:xsun@seu.edu.cn)

<sup>†</sup>These authors contributed to the paper as first authors.

#### Supplementary Figures and Tables

##### 1.1 Supplementary Table

**Table S1. The information of cell lines analyzed in this study**

| SampleID          | Sex    | Cell line type | Normal/Patient            |
|-------------------|--------|----------------|---------------------------|
| <b>H1</b>         | Male   | hESC           | Normal                    |
| <b>H1_BMP4</b>    | Male   | trophoblast    | Normal                    |
| <b>H9</b>         | Female | hESC           | Normal                    |
| <b>H9_BMP4</b>    | Female | trophoblast    | Normal                    |
| <b>MRucR</b>      | Female | iPSC           | Patient<br>(preeclampsia) |
| <b>MRucR_BMP4</b> | Female | trophoblast    | Patient<br>(preeclampsia) |

**Table S2.** The bioinformatics tools used in this study

| <b>Analysis</b>     | <b>Software</b> | <b>Notes</b>                                                                   | <b>Version</b> |
|---------------------|-----------------|--------------------------------------------------------------------------------|----------------|
| Quality control     | In house        |                                                                                |                |
| Alignment           | BWA             | Map the sequencing reads to the reference genome and the BAM file was obtained | 0.7.8-r455     |
|                     | SAMtools        | Sort bam                                                                       | 1              |
|                     | Picard          | Merge the bam file from the same sample and mark the duplicate reads           | 1.111          |
| SNP/InDel detection | Strelka2        | Detect and filter SNV and InDels                                               | 2              |
|                     | ANNOVAR         | Annotate variation site                                                        | 2018Apr16      |
| SV detection        | BreakDancer     | Detect SV                                                                      | V0.0.1         |
|                     | ANNOVAR         | Annotate variation site                                                        | 2018Apr16      |

**Table S3.** The data sets from different laboratories analyzed cell lines of H1 and BMP4-induced trophoblast H1\_BMP4 in this paper. All of the data can be retrieved through the corresponding GEO number.

| <b>Data</b>     |                                         | <b>H1 (GSE16256;<br/>GSE18927)</b> | <b>H1_BMP4<br/>(GSE16256;<br/>GSE18927)</b> |
|-----------------|-----------------------------------------|------------------------------------|---------------------------------------------|
| DNA methylation | WGBS(Whole-Genome Bisulfite Sequencing) | GSM429321                          | GSM602254                                   |
|                 |                                         | GSM429322                          | GSM602255                                   |
| Histone         | H3K27me3                                | GSM605308                          | GSM896164                                   |

|                            |           |           |           |
|----------------------------|-----------|-----------|-----------|
| Modifications<br>ChIP-Seq  |           | GSM466734 | GSM753431 |
|                            | H3K27ac   | GSM466732 | GSM864800 |
|                            |           | GSM663427 | GSM753427 |
|                            | H3K4me3   | GSM605315 | GSM753441 |
|                            |           | GSM469971 | GSM753442 |
| Chromatin<br>accessibility | DNase-Seq | GSM878616 | GSM878628 |
|                            |           | GSM878628 | GSM878614 |
| Gene<br>expression         | RNA-Seq   | GSM915328 | GSM915320 |
|                            |           | GSM915329 | GSM915321 |

**Table S4. Overview of data production quality**

| Sample name    | Novo ID   | Raw reads | Raw data(G) | Raw depth(x) | Effective(%) | Error(%) | Q20(%) | Q30(%) | GC(%) |
|----------------|-----------|-----------|-------------|--------------|--------------|----------|--------|--------|-------|
| <b>H1</b>      | D17041657 | 3.32E+08  | 99.64       | 34.43        | 99.81        | 04       | 92.92  | 84.66  | 41.55 |
| <b>H1_BMP4</b> | D17041658 | 3.19E+08  | 95.7        | 33.06        | 99.8         | 0.02     | 95.81  | 90.17  | 41.44 |
| <b>H9</b>      | D17041659 | 3.40E+08  | 102.06      | 35.26        | 99.83        | 0.02     | 95.97  | 90.42  | 41.16 |
| <b>H9_BMP4</b> | D17041660 | 3.46E+08  | 103.71      | 35.83        | 99.79        | 0.02     | 95.8   | 90.16  | 41.17 |
| <b>MRucR</b>   | D17041661 | 3.08E+08  | 92.54       | 31.97        | 99.82        | 0.03     | 92.89  | 84.54  | 41.25 |

|                       |                |          |       |       |       |      |       |       |       |
|-----------------------|----------------|----------|-------|-------|-------|------|-------|-------|-------|
| <b>MRucR<br/>BMP4</b> | D1704166<br>2P | 3.03E+08 | 91.02 | 31.45 | 99.73 | 0.04 | 92.84 | 84.54 | 41.23 |
|-----------------------|----------------|----------|-------|-------|-------|------|-------|-------|-------|

Note:

- (1) Sample name: Sample name.
- (2) Novo ID: Novogene ID of the sample.
- (3) Lane: The flowcell ID and lane number during the sequencing (FlowcellID\_LaneNumber).
- (4) Raw reads: The number of sequencing reads pairs; four lines will be considered as one unit according to FASTQ format.
- (5) Raw data (G): The original sequence data volume.
- (6) Raw depth (x): The original sequence depth.
- (7) Effective (%): The percentage of clean reads in all raw reads.
- (8) Error (%): The average error rate of all bases.
- (9) Q20: The percentage of bases with Phred score  $\geq 20$ .
- (10) Q30: The percentage of bases with Phred score  $\geq 30$ .
- (11) GC: The percentage of G and C in the total bases.

**Table S5.** Mapping rate and coverage

| <b>Sample:1</b>    | <b>H1</b>                | <b>H1_BMP<br/>4</b>  | <b>H9</b>                    | <b>H9_BMP4</b>        | <b>MRucR</b>             | <b>MRucR_BMP<br/>4</b> |
|--------------------|--------------------------|----------------------|------------------------------|-----------------------|--------------------------|------------------------|
| <b>Total:2</b>     | 6629949<br>98<br>(100%)  | 63666996<br>0 (100%) | 679231<br>148<br>(100%)      | 689959414<br>(100%)   | 6158285<br>96<br>(100%)  | 605144646<br>(100%)    |
| <b>Duplicate:3</b> | 7541783<br>3<br>(11.40%) | 88802963<br>(13.96%) | 920837<br>13<br>(13.57<br>%) | 94334955<br>(13.68%)  | 7260333<br>3<br>(11.82%) | 60969448<br>(10.13%)   |
| <b>Mapped:4</b>    | 6614266<br>54            | 63614437<br>7        | 678740<br>317<br>(99.93      | 689360772<br>(99.91%) | 6142527<br>37            | 601732042<br>(99.44%)  |

|                                                            |                       |                       |                       |                       |                       |                       |
|------------------------------------------------------------|-----------------------|-----------------------|-----------------------|-----------------------|-----------------------|-----------------------|
|                                                            | (99.76%)              | (99.92%)              | %)                    |                       | (99.74%)              |                       |
| <b>Properly mapped:5</b>                                   | 646497086<br>(97.51%) | 623844710<br>(97.99%) | 663535732<br>(97.69%) | 675030636<br>(97.84%) | 601012644<br>(97.59%) | 584154878<br>(96.53%) |
| <b>PE mapped:6</b>                                         | 660208754<br>(99.58%) | 635643528<br>(99.84%) | 678266476<br>(99.86%) | 688779994<br>(99.83%) | 613047432<br>(99.55%) | 598995418<br>(98.98%) |
| <b>SE mapped:7</b>                                         | 2435800<br>(0.37%)    | 1001698<br>(0.16%)    | 947682<br>(0.14%)     | 1161556<br>(0.17%)    | 2410610<br>(0.39%)    | 5473248<br>(0.90%)    |
| <b>With mate mapped to a different chr:8</b>               | 9829294<br>(1.48%)    | 7618776<br>(1.20%)    | 10883966<br>(1.60%)   | 9300750<br>(1.35%)    | 8687356<br>(1.41%)    | 10980468<br>(1.81%)   |
| <b>With mate mapped to a different chr ((mapQ&gt;=5):9</b> | 8435837<br>(1.27%)    | 6389141<br>(1.00%)    | 9543489<br>(1.41%)    | 7950739<br>(1.15%)    | 7513706<br>(1.22%)    | 9505529<br>(1.57%)    |
| <b>Average sequencing depth:10</b>                         | 33.27                 | 32.13                 | 34.38                 | 34.84                 | 31.05                 | 30.21                 |
| <b>Coverage:11</b>                                         | 99.84%                | 99.85%                | 99.14%                | 99.14%                | 99.11%                | 99.11%                |
| <b>Coverage_at _least_4X:12</b>                            | 99.71%                | 99.71%                | 98.97%                | 98.98%                | 98.94%                | 98.94%                |
| <b>Coverage_at _least_10X:13</b>                           | 98.90%                | 98.81%                | 98.65%                | 98.69%                | 98.52%                | 98.51%                |
| <b>Coverage_at _least_20X:</b>                             | 91.42%                | 90.66%                | 95.35%                | 96.10%                | 92.29%                | 91.60%                |

|           |  |  |  |  |  |  |
|-----------|--|--|--|--|--|--|
| <b>14</b> |  |  |  |  |  |  |
|-----------|--|--|--|--|--|--|

Note:

- (1) Total: The total number of clean reads
- (2) Duplicate: The number of duplication reads
- (3) Mapped: The number of total reads that mapped to the reference genome (percentage)
- (4) Properly mapped: The number of reads that mapped to the reference genome and the direction is right
- (5) PE mapped: The number of pair-end reads that mapped to the reference genome (percentage)
- (6) SE mapped: The number of single-end reads that mapped to the reference genome
- (7) With mate mapped to a different chr: The number of mate reads that mapped to the different chromosomes (percentage)
- (8) With mate mapped to a different chr (mapQ $\geq$ 5): The number of mate reads that mapped to the different chromosomes and the MAQ  $>5$
- (9) Average\_sequencing\_depth: The average sequencing depth that mapped to the reference genome
- (10) Coverage: The sequence coverage of genome
- (11) Coverage\_at\_least\_4X: The percentage of bases with depth  $>4\times$  in whole genome bases
- (12) Coverage\_at\_least\_10X: The percentage of bases with depth  $>10\times$  in whole genome bases
- (13) Coverage\_at\_least\_20X: The percentage of bases with depth  $>20\times$  in whole genome bases

**Table S6.** The top 20 key TFs were selected around the variations using HOMER in H1.

| <b>Rank</b> | <b>TF</b> | <b>Description</b>                          | <b>Count</b> | <b>MotifScore</b> | <b>Reference</b>          |
|-------------|-----------|---------------------------------------------|--------------|-------------------|---------------------------|
| <b>1</b>    | SREBP1A   | Sterol regulatory element-binding protein 1 | 314          | 10.71             | (Lecomte et al., 2010)    |
| <b>2</b>    | SREBP2    | Sterol Response Element Binding Protein 2   | 262          | 11.31             |                           |
| <b>3</b>    | GATA2     | GATA-binding factor 2                       | 213          | 10.65             | (Ray et al., 2009; Bai et |

---

|           |       |                                                                          |     |       |                                 |
|-----------|-------|--------------------------------------------------------------------------|-----|-------|---------------------------------|
|           |       |                                                                          |     |       | al., 2012)                      |
| <b>4</b>  | OCT4  | Octamer-binding transcription factor 4                                   | 186 | 10.77 | (Wang et al., 2012)             |
| <b>5</b>  | STAT3 | Signal transducer and activator of transcription 3                       | 173 | 10.39 | (Poehlmann et al., 2005)        |
| <b>6</b>  | NFAT  | Nuclear factor of activated T-cells                                      | 166 | 10.58 | (Li et al., 2011)               |
| <b>7</b>  | KLF3  | Kruppel-like factor 3                                                    | 155 | 10.54 | (Bruce et al., 2007)            |
| <b>8</b>  | NR5A2 | Nuclear receptor subfamily 5, also known as the liver receptor homolog-1 | 152 | 10.58 | (Heng et al., 2010)             |
| <b>9</b>  | TEAD1 | Transcriptional enhancer factor TEF-1                                    | 136 | 10.58 | (Nishioka et al., 2008)         |
| <b>10</b> | IRF3  | interferon regulatory factor-3                                           | 128 | 10.63 |                                 |
| <b>11</b> | TEAD2 | TEA Domain Transcription Factor 2                                        | 127 | 10.56 | (Nishioka et al., 2008)         |
| <b>12</b> | P63   | Tumor Protein p63                                                        | 116 | 11.26 | (Li et al., 2014)               |
| <b>13</b> | STAT1 | Signal transducer and activator of transcription 1                       | 116 | 10.69 | (Pereira de Sousa et al., 2017) |
| <b>14</b> | FOXP1 | Forkhead box protein P1                                                  | 115 | 10.34 |                                 |
| <b>15</b> | TEAD3 | Transcriptional Enhancer Factor TEF-3                                    | 102 | 10.77 | (Jacquemin et al., 1998)        |
| <b>16</b> | KLF10 | Kruppel-like factor 10                                                   | 98  | 10.81 |                                 |
| <b>17</b> | AP-1  | Activator protein 1                                                      | 97  | 11.16 | (Kubota et                      |

---

|           |        |                                        |    |       | al., 2015)             |
|-----------|--------|----------------------------------------|----|-------|------------------------|
| <b>18</b> | ZNF322 | Zinc Finger Protein 322                | 91 | 10.80 |                        |
| <b>19</b> | OCT6   | Octamer-binding transcription factor 6 | 90 | 10.57 | (Knöfler et al., 2019) |
| <b>20</b> | SOX4   | Sex Determining Region Y (SRY)-Box 4   | 88 | 10.49 |                        |

**Table S7.** The top 20 key TFs were selected around the variations using HOMER in H1\_BMP4.

| <b>Rank</b> | <b>TF</b> | <b>Description</b>                                 | <b>Count</b> | <b>MotifScore</b> | <b>Reference</b>                     |
|-------------|-----------|----------------------------------------------------|--------------|-------------------|--------------------------------------|
| <b>1</b>    | SREB P1A  | Sterol regulatory element-binding protein 1        | 312          | 10.71             | (Lecomte et al., 2010)               |
| <b>2</b>    | SREB P2   | Sterol Response Element Binding Protein 2          | 262          | 11.31             |                                      |
| <b>3</b>    | GATA 2    | GATA-binding factor 2                              | 212          | 10.65             | (Ray et al., 2009; Bai et al., 2012) |
| <b>4</b>    | STAT 3    | Signal transducer and activator of transcription 3 | 176          | 10.39             | (Poehlmann et al., 2005)             |
| <b>5</b>    | NFAT      | Nuclear factor of activated T-cells                | 163          | 10.58             | (Li et al., 2011)                    |
| <b>6</b>    | CEBP A    | CCAAT Enhancer Binding Protein Alpha               | 147          | 10.81             | (Simmons et al., 2008)               |
| <b>7</b>    | GATA 3    | GATA binding protein 3                             | 145          | 11.15             | (Kubaczka et al., 2015)              |
| <b>8</b>    | TEAD      | Transcriptional enhancer factor TEF-               | 134          | 10.58             | (Nishioka et al.,                    |



|           |                  |                                                    |     |       |                                 |
|-----------|------------------|----------------------------------------------------|-----|-------|---------------------------------|
|           | 1                | 1                                                  |     |       | 2008)                           |
| <b>9</b>  | KLF4             | Kruppel-like factor 4                              | 132 | 11.37 | (Abad et al., 2013)             |
| <b>10</b> | KLF3             | Kruppel-like factor 3                              | 130 | 10.54 | (Bruce et al., 2007)            |
| <b>11</b> | TEAD<br>2        | TEA Domain Transcription Factor 2                  | 127 | 10.56 | (Nishioka et al., 2008)         |
| <b>12</b> | IRF3             | interferon regulatory factor-3                     | 126 | 10.63 |                                 |
| <b>13</b> | THRB             | Thyroid hormone receptor beta                      | 117 | 10.66 |                                 |
| <b>14</b> | P63              | Tumor Protein p63                                  | 116 | 11.26 | (Li et al., 2014)               |
| <b>15</b> | STAT<br>1        | Signal transducer and activator of transcription 1 | 116 | 10.69 | (Pereira de Sousa et al., 2017) |
| <b>16</b> | FOXP<br>1        | Forkhead box protein P1                            | 115 | 10.34 |                                 |
| <b>17</b> | ZEB2             | Zinc finger E-box binding homeobox<br>2            | 109 | 10.43 | (DaSilva-Arnold et al., 2019)   |
| <b>18</b> | TEAD<br>3        | Transcriptional Enhancer Factor<br>TEF-3           | 102 | 10.77 | (Jacquemin et al., 1998)        |
| <b>19</b> | KLF1<br>0        | Kruppel-like factor 10                             | 100 | 10.82 |                                 |
| <b>20</b> | AP-2<br>$\alpha$ | Adaptor Protein complex 2, $\alpha$<br>subunit     | 96  | 11.17 | (Biadasiewicz et al., 2011)     |

**Table S8.** The key TFs were selected around the variations using HOMER between H1 and H1\_BMP4

| <b>TF</b> | <b>Description</b>            | <b>Motif count difference (H1-H1_BMP4)</b> | <b>Motif count in H1</b> | <b>Motif count in H1_BMP4</b> | <b>Reference</b>        |
|-----------|-------------------------------|--------------------------------------------|--------------------------|-------------------------------|-------------------------|
| Zfp281    | Krüppel - like zinc finger TF | 39                                         | 47                       | 8                             | (Ishiuchi et al., 2019) |
| OCT       | Octamer-binding proteins      | 30                                         | 30                       | 0                             | (Xu et al., 2002)       |
| KLF3      | Kruppel-like factor 3         | 17                                         | 18                       | 1                             | (Bruce et al., 2007)    |

## 1.2 Supplementary Figures

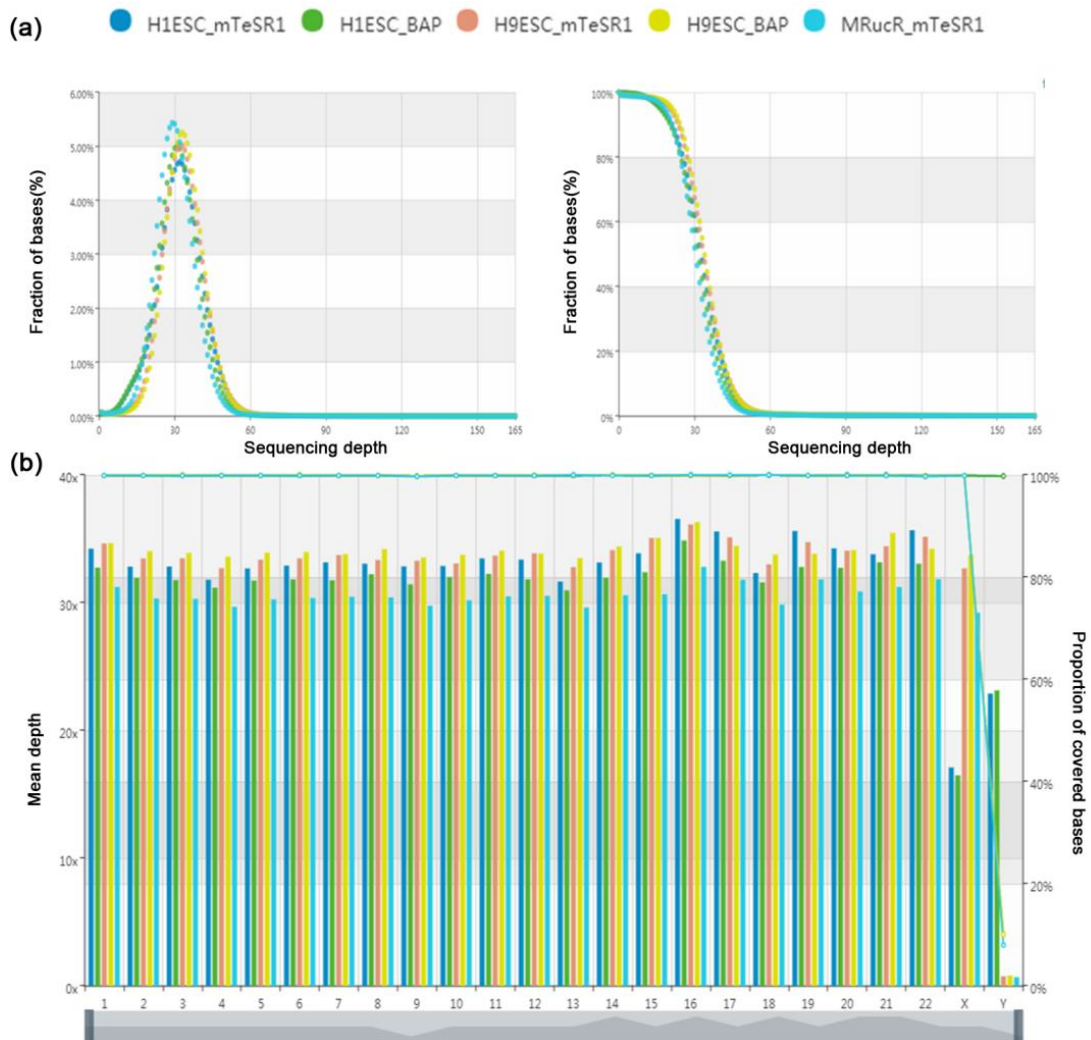

**Figure S1 Sequencing Depth and Coverage Distribution.** (a) Sequencing depth. The left figure is the ratio of bases with different sequencing depth. The x-axis is sequencing depth; the y-axis is the fraction of bases with the given sequencing depth. The right figure is accumulative base ratio with different depth. The x-axis is sequencing depth; the y-axis is the fraction of bases above the given sequencing depth. For example, the sequencing depth of  $0\times$  corresponds to the base ratio of 100%, showing that 100% base's sequencing depth  $>0\times$ . (b) The coverage depth (the left coordinate) and coverage rate (the right coordinate) of chromosome. The x-axis is chromosome number; the left y-axis is the average depth of each chromosome (Raw data/length\_of\_chromosome); the right y-axis is the fraction of covered on each chromosome (The number of bases covered by reads/total number of bases).

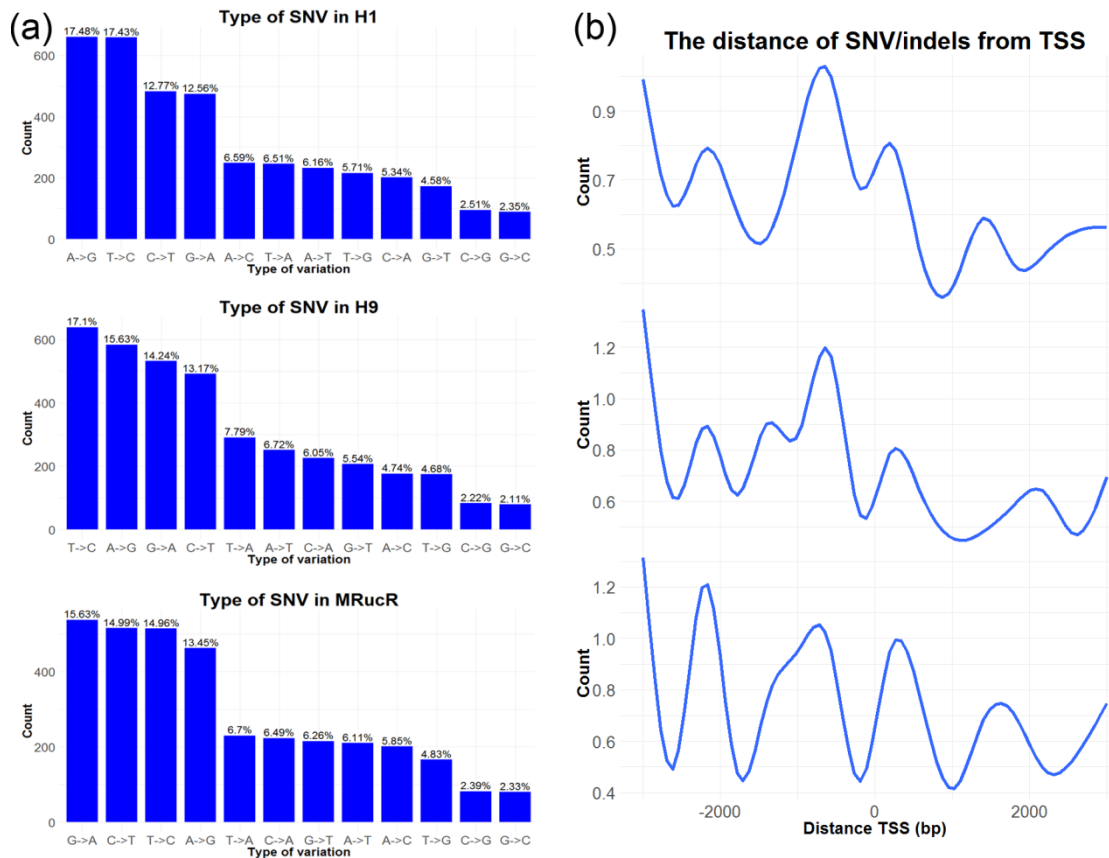

**Figure S2.** General features of paired whole genome sequencing genomic data of hESC and trophoblast from three cell lines (H1, H9 and MRucR). From top to bottom were matched hESC-trophoblast cell lines of H1, H9 and MRucR, respectively. (a) Frequency of SNV single-base changes between hESC and trophoblast cell lines. (b) The distribution of SNV/indels distance from 2500bp upstream and downstream of TSSs.

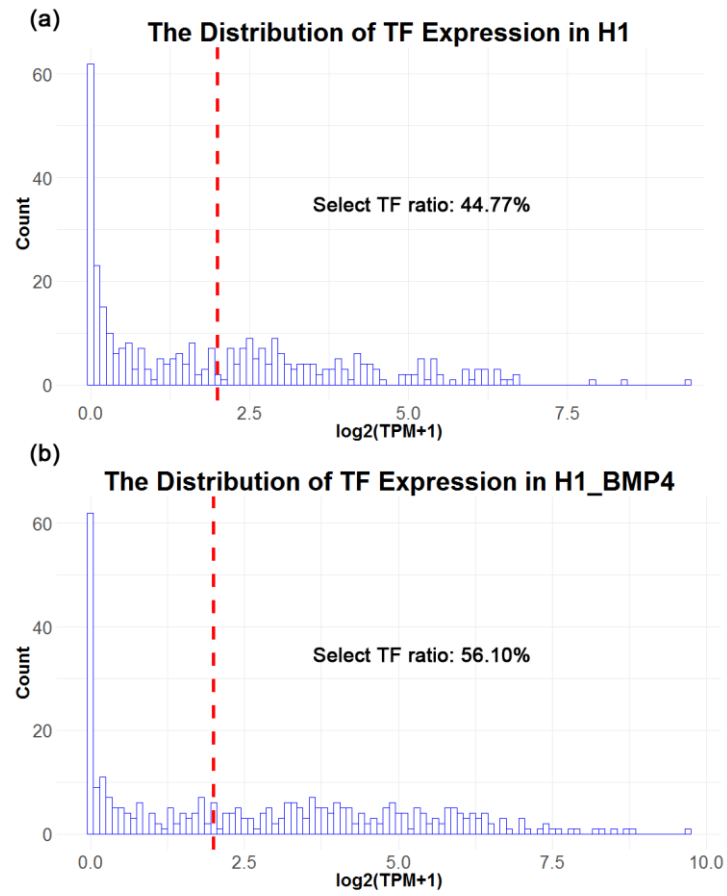

**Figure S3.** The distribution of TF expression in H1 (a) and H1\_BMP4 (b).

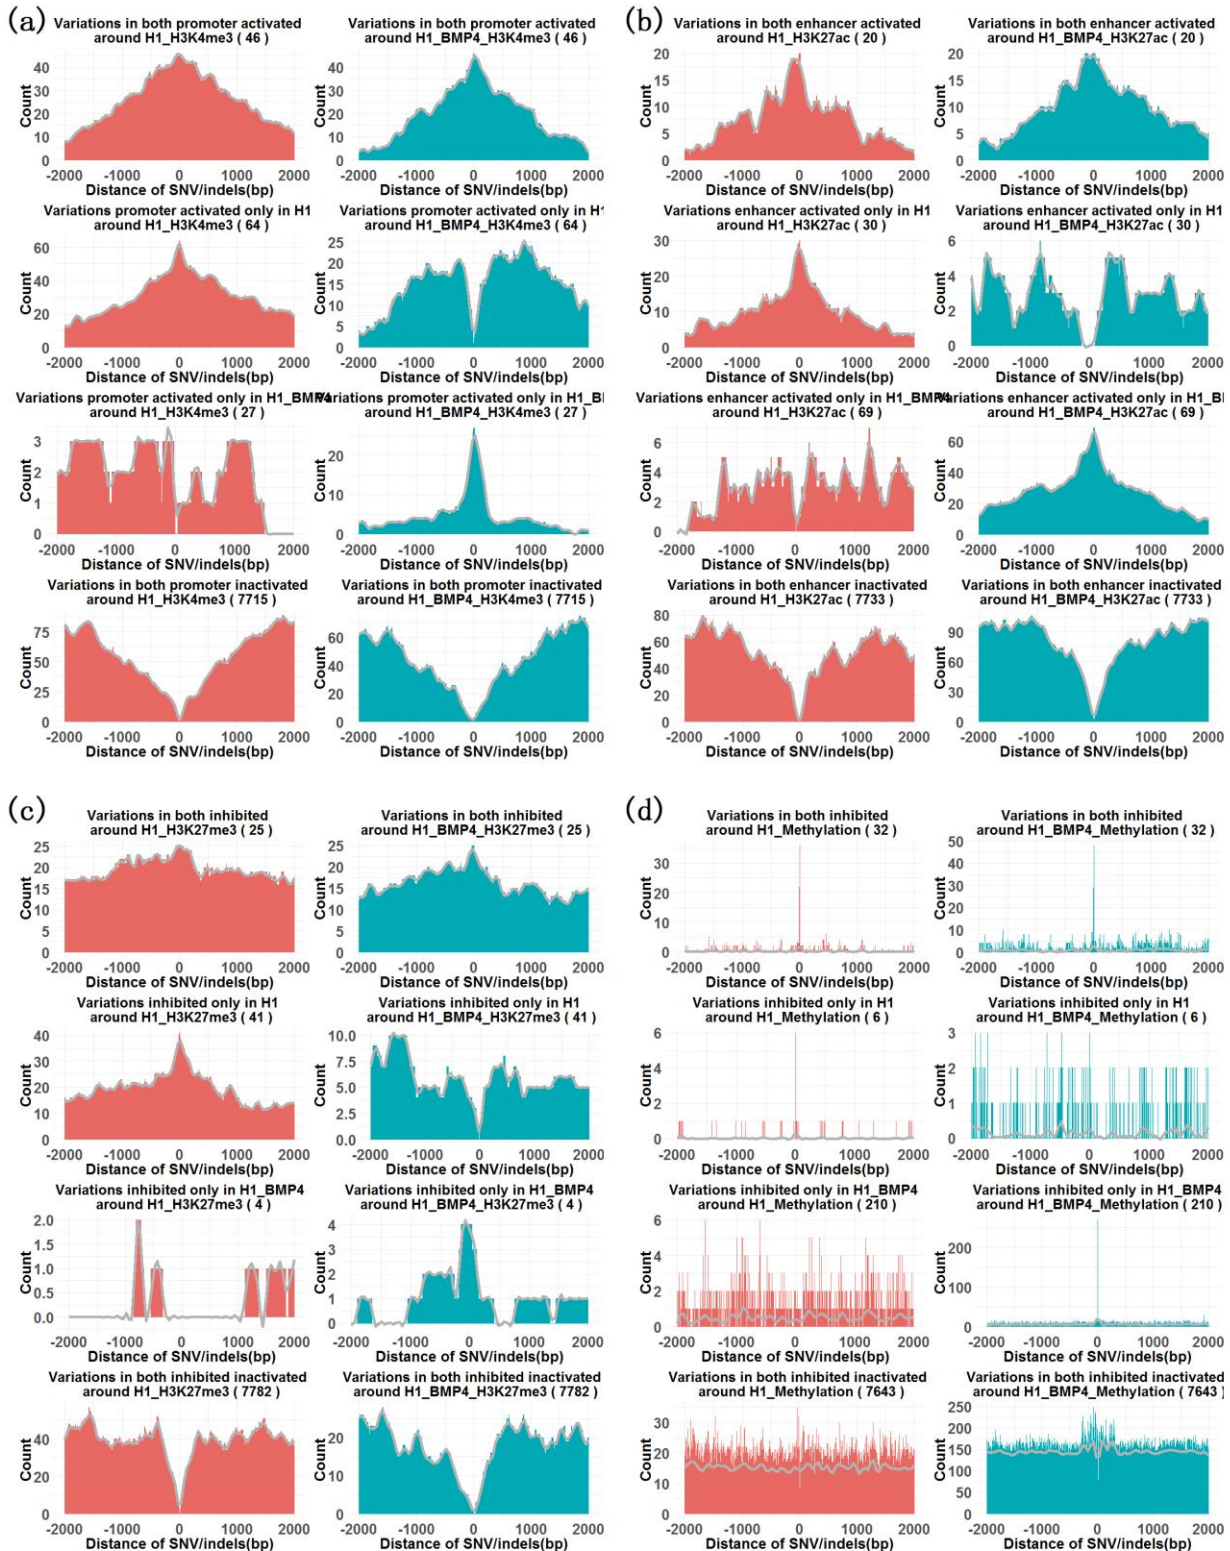

**Figure S4.** The peaks surrounding SNV/indels of histone modifications and DNA methylation were counted. X-axis is the upstream and downstream 2Kbp sequence of SNV/indels. Y-axis is the number of peak counts. Subplots of histone modifications and DNA methylation are (a) H3K4me3, (b) H3K27ac, (c) H3K27me3 and (d) DNA methylation, respectively. The left column of each subplot is

peak counts in H1, while the right column of each subplot is that of H1\_BMP4. The first line of each subplot is the variation located in the peak region of the epigenetic data of H1 and the peak region of the epigenetic data of H1\_BMP4. The second line of each subplot is the variation located in the peak region of the epigenetic data of H1 but not in the peak region of the epigenetic data of H1\_BMP4. The third line of each subplot is the variation didn't locate in the peak region of the epigenetic data of H1 but the peak region of the epigenetic data of H1\_BMP4. The fourth line of each subplot is the variation didn't locate in the peak region of the epigenetic data of H1 and not in the peak region of the epigenetic data of H1\_BMP4.

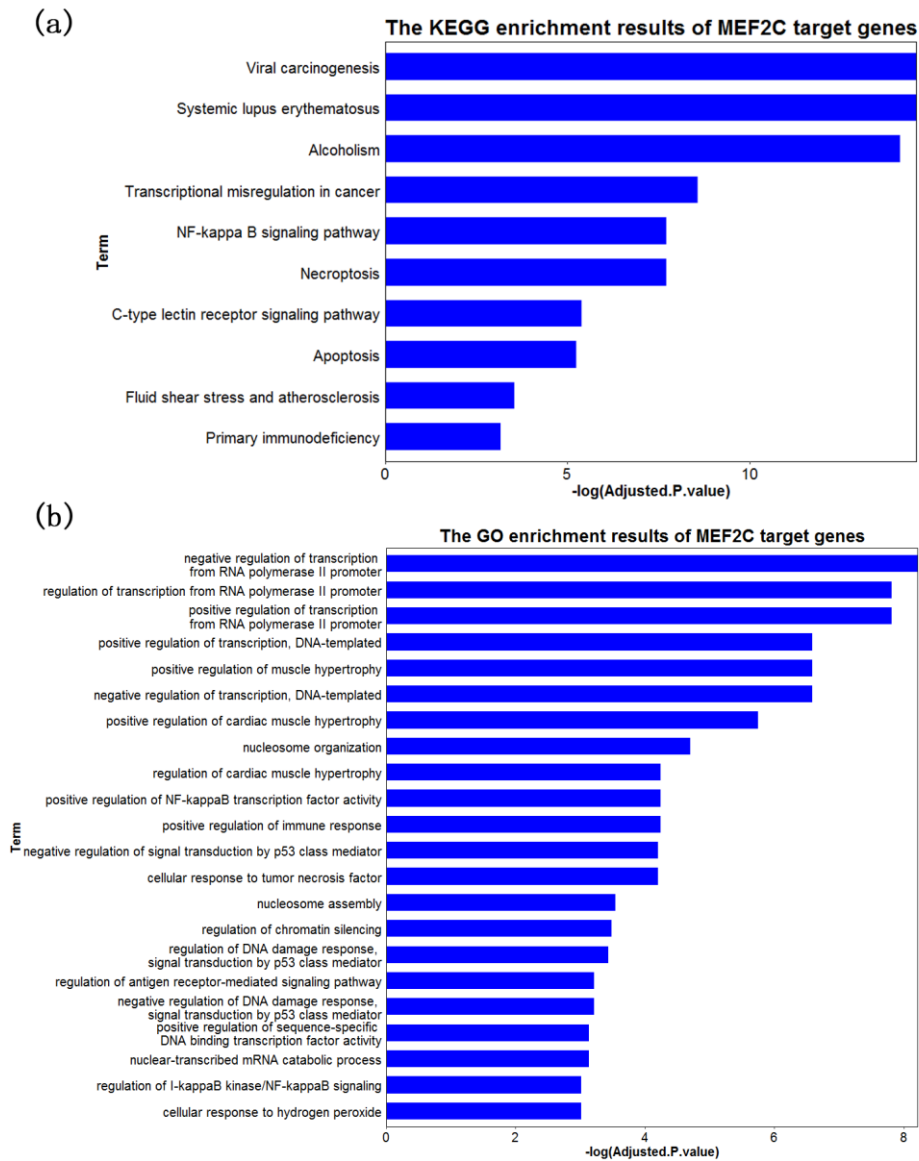

**Figure S5.** The significantly pathways and biological process for target genes of MEF2C transcription factors use Enrichr. An adjust P-vale, 0.05, was chosen as significant thresholds upon filtering the pathway data.

## Reference

- Abad, M., Mosteiro, L., Pantoja, C., Cañamero, M., Rayon, T., Ors, I., et al. (2013). Reprogramming *in vivo* produces teratomas and iPS cells with totipotency features. *Nature* 502, 340–345. doi:10.1038/nature12586.
- Bai, Q., Assou, S., Haouzi, D., Ramirez, J.-M., Monzo, C., Becker, F., et al. (2012). Dissecting the first transcriptional divergence during human embryonic development. *Stem Cell Rev Rep* 8, 150–162. doi:10.1007/s12015-011-9301-3.
- Biadasiewicz, K., Sonderegger, S., Haslinger, P., Haider, S., Saleh, L., Fiala, C., et al. (2011). Transcription factor AP-2 $\alpha$  promotes EGF-dependent invasion of human trophoblast. *Endocrinology* 152, 1458–1469. doi:10.1210/en.2010-0936.
- Bruce, S. J., Gardiner, B. B., Burke, L. J., Gongora, M. M., Grimmond, S. M., and Perkins, A. C. (2007). Dynamic transcription programs during ES cell differentiation towards mesoderm in serum versus serum-free BMP4 culture. *BMC Genomics* 8, 365. doi:10.1186/1471-2164-8-365.
- DaSilva-Arnold, S. C., Kuo, C.-Y., Davra, V., Remache, Y., Kim, P. C. W., Fisher, J. P., et al. (2019). ZEB2, a master regulator of the epithelial-mesenchymal transition, mediates trophoblast differentiation. *Mol. Hum. Reprod.* 25, 61–75. doi:10.1093/molehr/gay053.
- Heng, J.-C. D., Feng, B., Han, J., Jiang, J., Kraus, P., Ng, J.-H., et al. (2010). The Nuclear Receptor Nr5a2 Can Replace Oct4 in the Reprogramming of Murine Somatic Cells to Pluripotent Cells. *Cell Stem Cell* 6, 167–174. doi:10.1016/j.stem.2009.12.009.
- Ishiuchi, T., Ohishi, H., Sato, T., Kamimura, S., Yorino, M., Abe, S., and Sasaki, H. (2019). Zfp281 shapes the transcriptome of trophoblast stem cells and is essential for placental development. *Cell reports*, 27(6), 1742–1754.
- Jacquemin, P., Sapin, V., Alsat, E., Evain-Brion, D., Dollé, P., and Davidson, I. (1998). Differential expression of the TEF family of transcription factors in the murine placenta and during differentiation of primary human trophoblasts in vitro. *Dev. Dyn.* 212, 423–436. doi:10.1002/(SICI)1097-0177(199807)212:3<423::AID-AJA10>3.0.CO;2-1.
- Knöfler, M., Haider, S., Saleh, L., Pollheimer, J., Gamage, T. K. J. B., and James, J. (2019). Human placenta and trophoblast development: key molecular mechanisms and model systems. *Cell. Mol. Life Sci.* 76, 3479–3496. doi:10.1007/s00018-019-03104-6.
- Kubaczka, C., Senner, C. E., Cierlitz, M., Araúzo-Bravo, M. J., Kuckenberger, P., Peitz, M., et al. (2015). Direct Induction of Trophoblast Stem Cells from Murine Fibroblasts. *Cell Stem Cell* 17, 557–568. doi:10.1016/j.stem.2015.08.005.
- Kubota, K., Kent, L. N., Rumi, M. A. K., Roby, K. F., and Soares, M. J. (2015). Dynamic Regulation of AP-1 Transcriptional Complexes Directs Trophoblast Differentiation. *Molecular and Cellular Biology* 35, 3163–3177. doi:10.1128/MCB.00118-15.
- Lecomte, V., Meugnier, E., Euthine, V., Durand, C., Freyssen, D., Nemoz, G., et al. (2010). A New Role for Sterol Regulatory Element Binding Protein 1 Transcription Factors in the Regulation of Muscle Mass and Muscle Cell Differentiation. *Mol Cell Biol* 30, 1182–1198. doi:10.1128/MCB.00690-09.
- Li, X., Zhu, L., Yang, A., Lin, J., Tang, F., Jin, S., et al. (2011). Calcineurin-NFAT Signaling Critically Regulates Early Lineage Specification in Mouse Embryonic Stem Cells and Embryos. *Cell Stem Cell* 8, 46–58. doi:10.1016/j.stem.2010.11.027.
- Li, Y., Moretto-Zita, M., Leon-Garcia, S., and Parast, M. M. (2014). p63 inhibits extravillous trophoblast migration and maintains cells in a cytotrophoblast stem cell-like state. *Am. J. Pathol.* 184, 3332–3343. doi:10.1016/j.ajpath.2014.08.006.



- Nishioka, N., Yamamoto, S., Kiyonari, H., Sato, H., Sawada, A., Ota, M., et al. (2008). Tead4 is required for specification of trophoderm in pre-implantation mouse embryos. *Mechanisms of Development* 125, 270–283. doi:10.1016/j.mod.2007.11.002.
- Pereira de Sousa, F. L., Chaiwangyen, W., Morales-Prieto, D. M., Ospina-Prieto, S., Weber, M., Photini, S. M., et al. (2017). Involvement of STAT1 in proliferation and invasiveness of trophoblastic cells. *Reproductive Biology* 17, 218–224. doi:10.1016/j.repbio.2017.05.005.
- Poehlmann, T. G., Fitzgerald, J. S., Meissner, A., Wengenmayer, T., Schleussner, E., Friedrich, K., et al. (2005). Trophoblast invasion: tuning through LIF, signalling via Stat3. *Placenta* 26 Suppl A, S37-41. doi:10.1016/j.placenta.2005.01.007.
- Ray, S., Dutta, D., Rumi, M. A. K., Kent, L. N., Soares, M. J., and Paul, S. (2009). Context-dependent function of regulatory elements and a switch in chromatin occupancy between GATA3 and GATA2 regulate Gata2 transcription during trophoblast differentiation. *J. Biol. Chem.* 284, 4978–4988. doi:10.1074/jbc.M807329200.
- Simmons, D. G., Natale, D. R. C., Begay, V., Hughes, M., Leutz, A., and Cross, J. C. (2008). Early patterning of the chorion leads to the trilaminar trophoblast cell structure in the placental labyrinth. *Development* 135, 2083–2091. doi:10.1242/dev.020099.
- Wang, Z., Oron, E., Nelson, B., Razis, S., and Ivanova, N. (2012). Distinct lineage specification roles for NANOG, OCT4, and SOX2 in human embryonic stem cells. *Cell Stem Cell* 10, 440–454. doi:10.1016/j.stem.2012.02.016.
- Xu, R. H., Chen, X., Li, D. S., Li, R., Addicks, G. C., Glennon, C., and Thomson, J. A. (2002). BMP4 initiates human embryonic stem cell differentiation to trophoblast. *Nature biotechnology*, 20(12), 1261-1264.
